# Supplementary material
Source: Springer Nature journal article supplement (https://www.springermedizin.de/resource/supplementary/12913_2011_2093_MOESM2_ESM.pdf/9529868)

## Geographical distribution of studies (%)

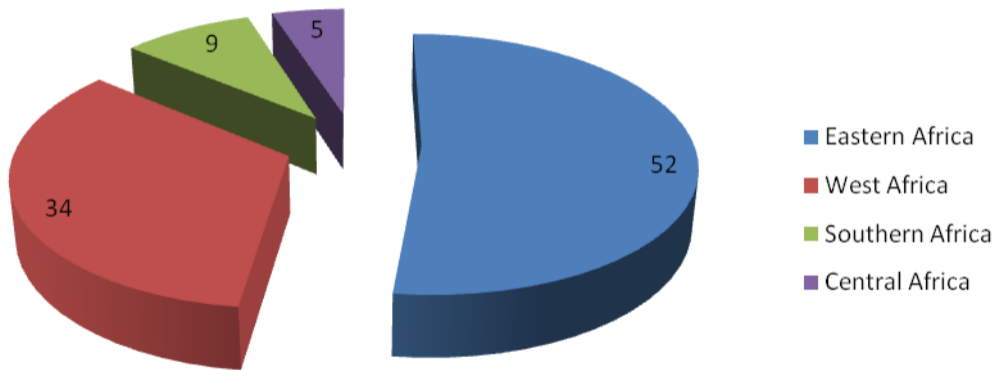

Supplement: MOESM2 [file 9529868]
